# Supplementary material for: Can lay health workers support the management of hypertension? Findings of a cluster randomised trial in South Africa
Source: PubMed Central journal article supplement (PMC5841534; doi:10.1136/bmjgh-2017-000577), 2018-02-15
Supplement: bmjgh-2017-000577supp001.pdf [file bmjgh-2017-000577supp001.pdf]

## Supplementary File

**Table S1 Relationship between usual clinic and last clinic visited**

| Last clinic visited | Usual clinic is Control %(n) |        |                     |        | Usual clinic is Intervention %(n) |        |                     |        |
|---------------------|------------------------------|--------|---------------------|--------|-----------------------------------|--------|---------------------|--------|
|                     | Baseline                     |        | End of intervention |        | Baseline                          |        | End of intervention |        |
| Control             | 97.7                         | (1833) | 96.6                | (1312) | 2.2                               | (33)   | 2.9                 | (30)   |
| Intervention        | 2.3                          | (43)   | 3.4                 | (46)   | 97.8                              | (1437) | 97.1                | (1019) |
| Total               | 100.0                        | (1876) | 100.0               | (1355) | 100.0                             | (1470) | 100.0               | (1049) |
